# Supplementary material for: Long-range metal–metal coupling in transition-metal 5,10,15,20-tetraferrocenylporphyrins
Source: Royal Society of Chemistry journal article supplement (doi:10.1039/c1nj20145j), 2011-01-01
Supplement: c1nj20145j.pdf [file c1nj20145j.pdf]

**Supporting Information for Manuscript:**

**Long-range metal-metal coupling in transition-metal 5,10,15,20-tetraferrocenylporphyrins**

Gregory T. Rohde,<sup>a</sup> Jared R. Sabin,<sup>a</sup> Christopher D. Barrett,<sup>a</sup> Victor N. Nemykin\*<sup>a</sup>

---

<sup>a</sup> *Department of Chemistry & Biochemistry, University of Minnesota Duluth, Duluth, MN 55812, USA. E-mail: vnemykin@d.umn.edu; Fax: +1 218 726 7394; Tel: +1 218 726 6729*

The absolute value of oxidation DPV scans were fit with four Gaussian functions (the peak area and width were constrained to be equal) for each fit to estimate the redox potentials of the individual ferrocenyl groups. The fitting parameters are displayed in the table next to the line fit.

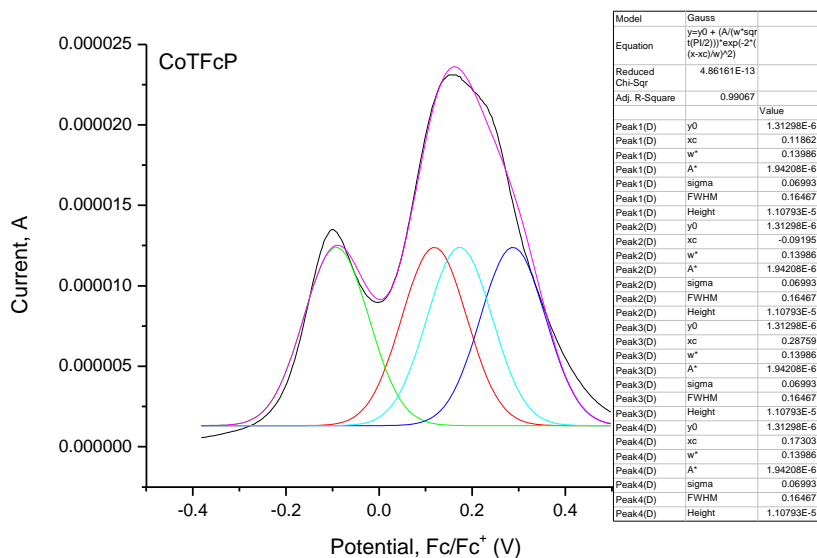

SI Figure 1. Fit of the ferrocenyl groups redox area of CoTFcP with four Gaussian peaks.

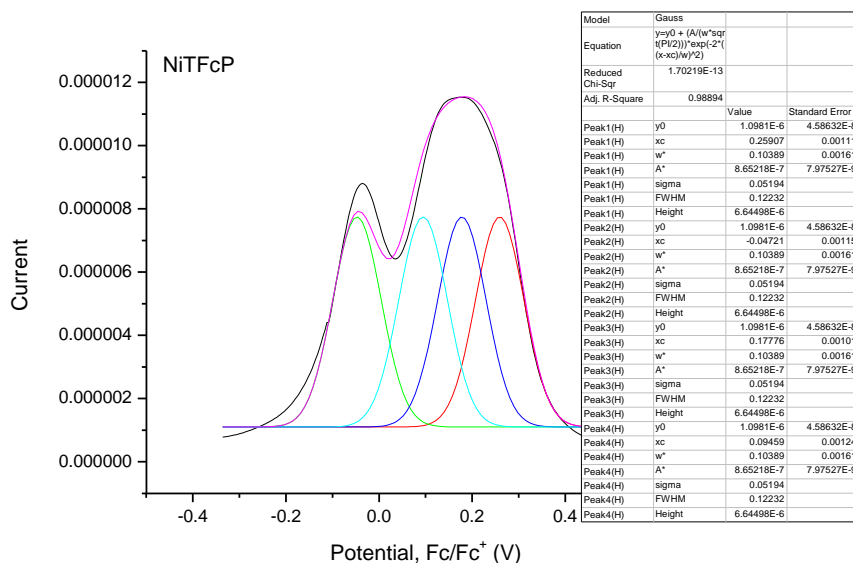

SI Figure 2. Fit of the ferrocenyl groups redox area of NiTFcP with four Gaussian peaks.

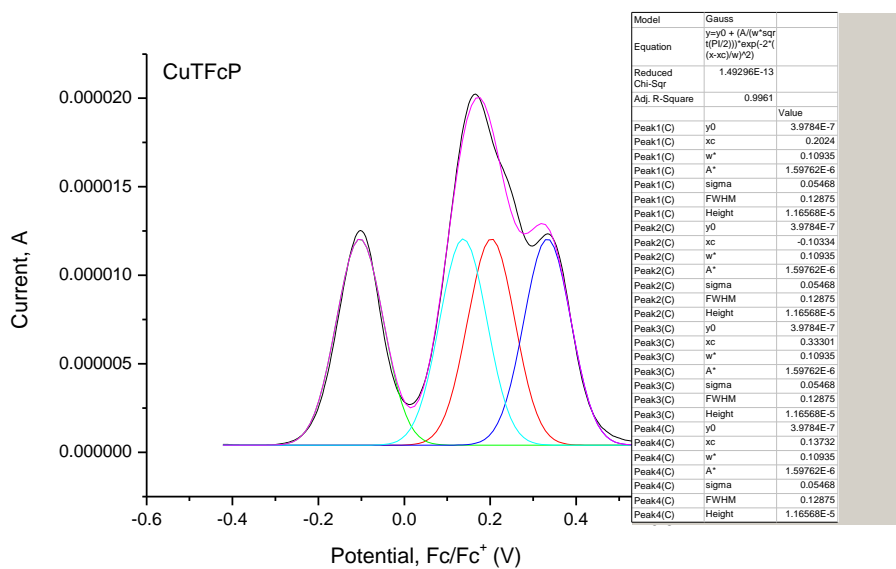

SI Figure 3. Fit of the ferrocenyl groups redox area of CuTFcP with four Gaussian peaks.

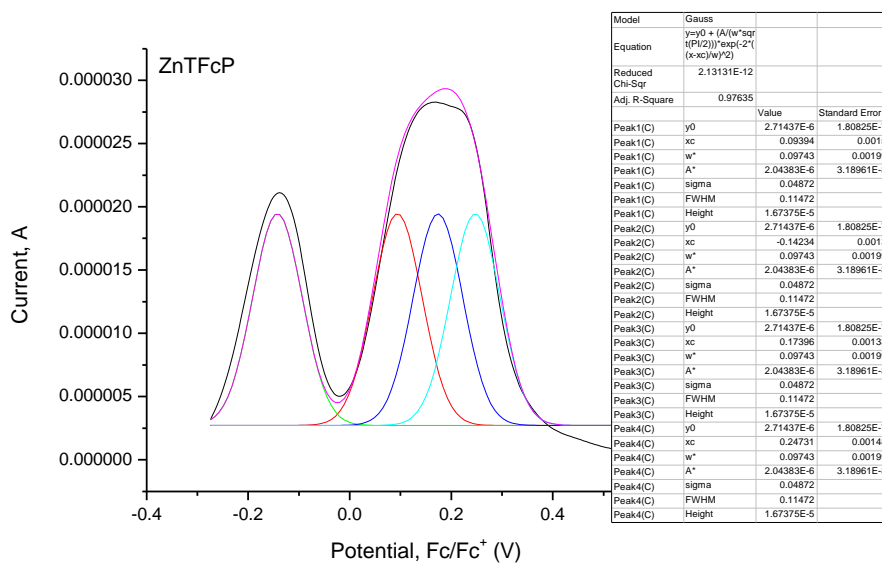

SI Figure 4. Fit of the ferrocenyl groups redox area of ZnTFcP with four Gaussian peaks.

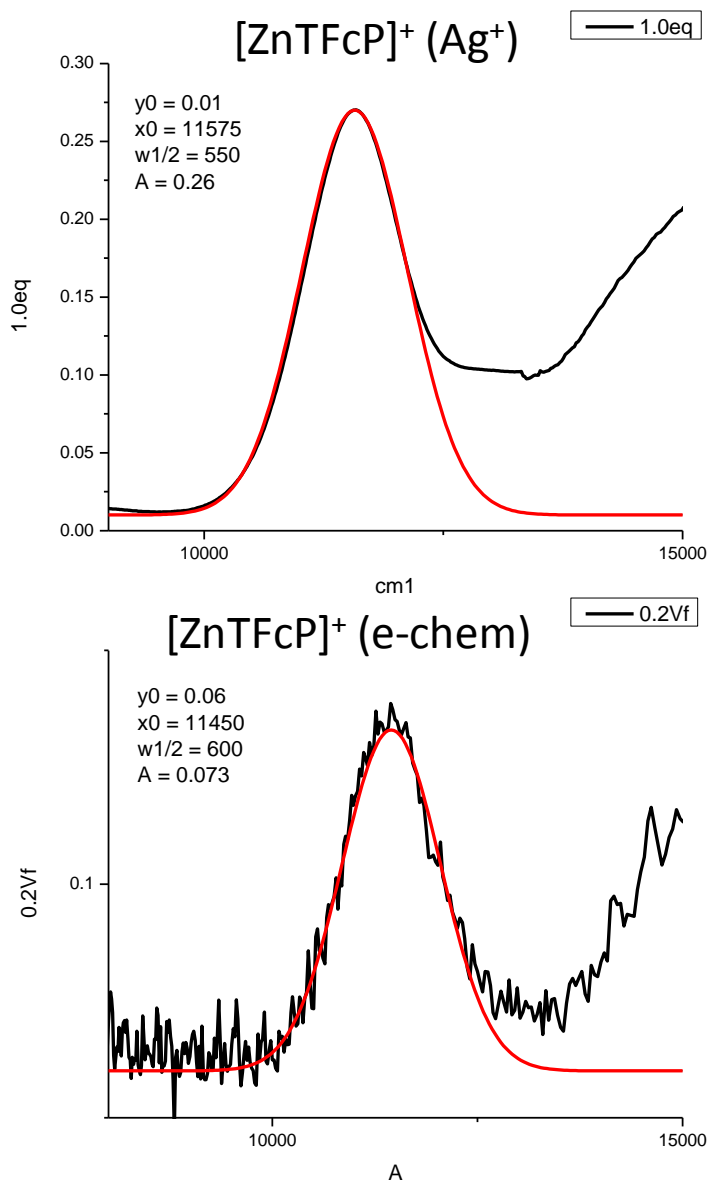

**SI Figure 5.** Fit of the IVCT band in [ZnTFcP]<sup>+</sup> with Gaussian peaks. Only IVCT peak deconvolution is shown.

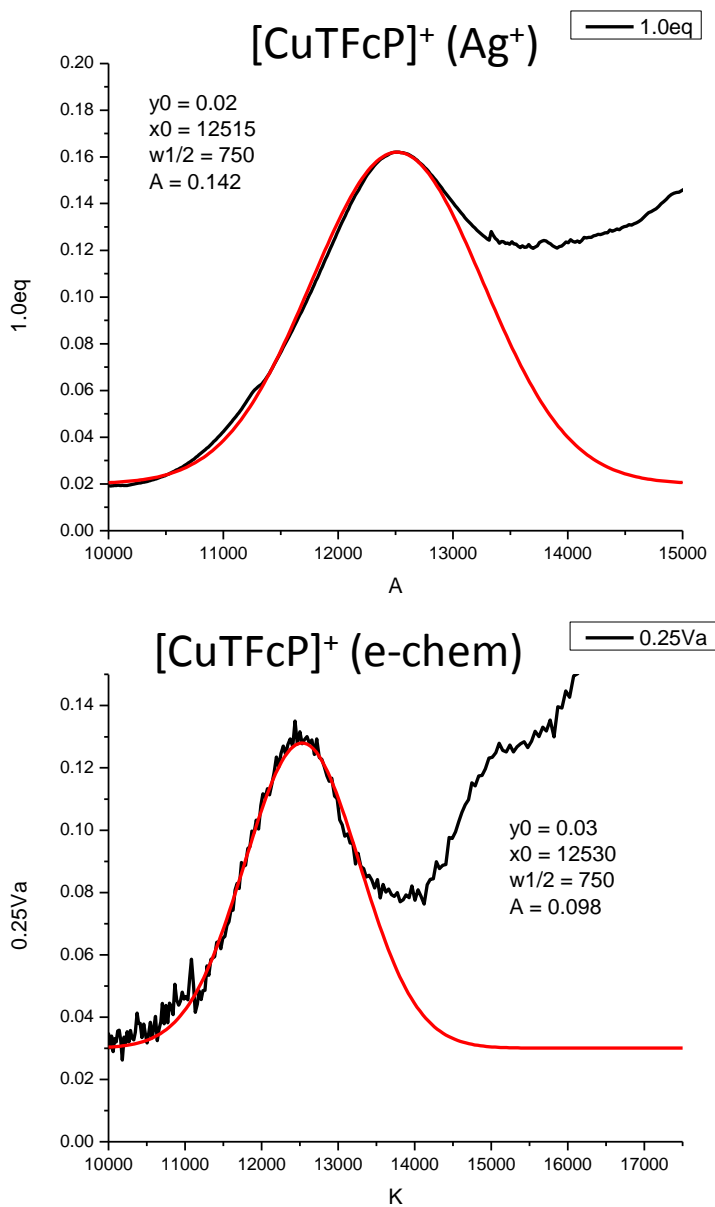

**SI Figure 6.** Fit of the IVCT band in [CuTFcP]<sup>+</sup> with Gaussian peaks. Only IVCT peak deconvolution is shown.

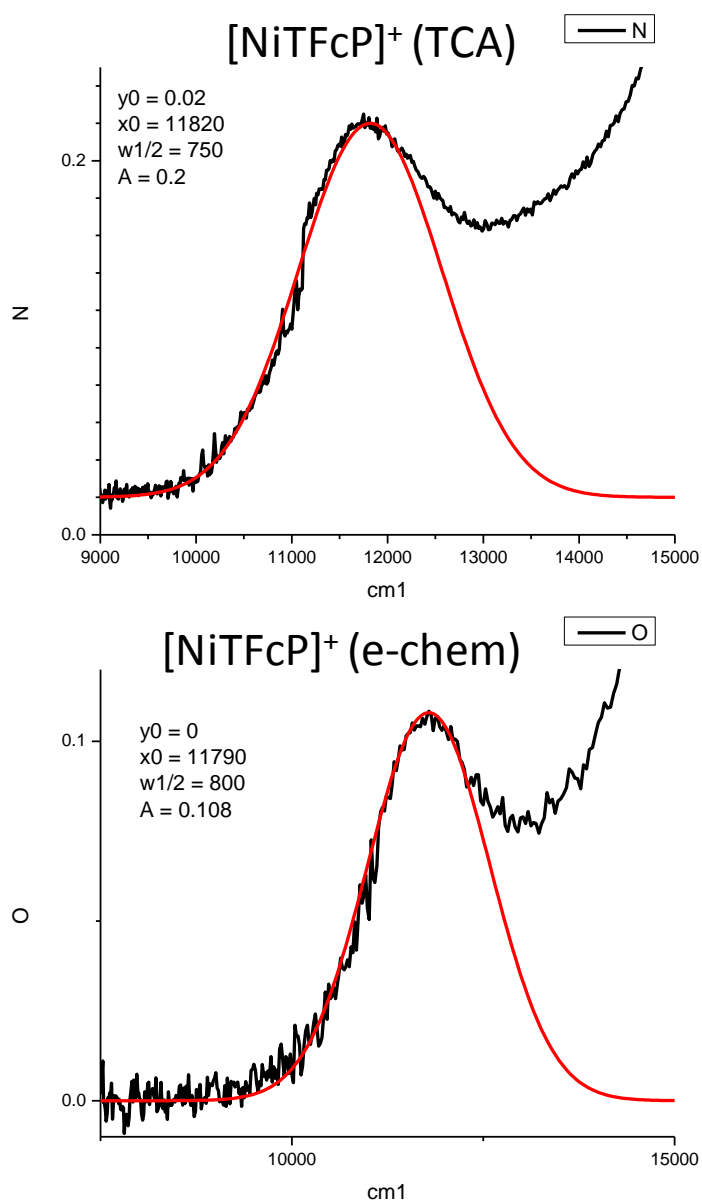

**SI Figure 7.** Fit of the IVCT band in [NiTFcP]<sup>+</sup> with Gaussian peaks. Only IVCT peak deconvolution is shown.

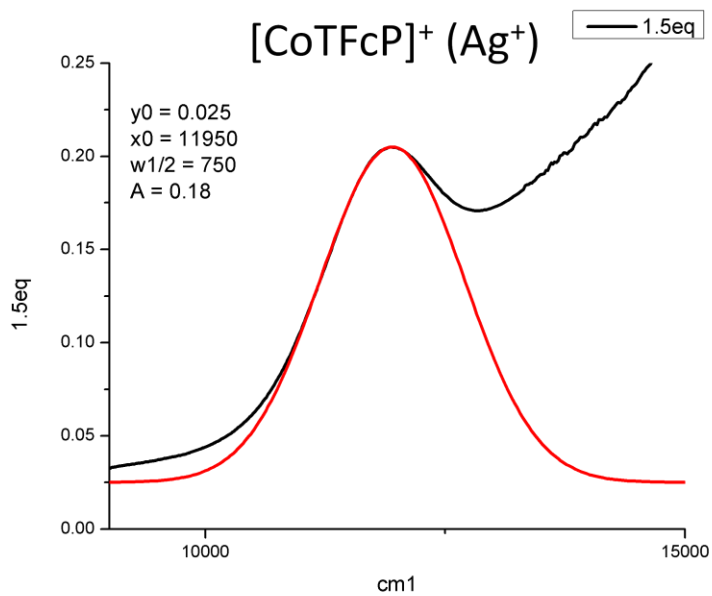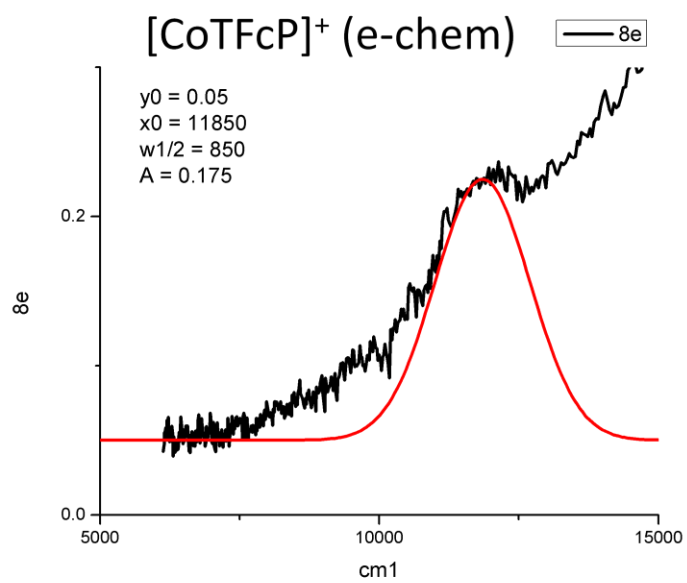

**SI Figure 8.** Fit of the IVCT band in  $[\text{CoTFcP}]^+$  with Gaussian peaks. Only IVCT peak deconvolution is shown.
